# Supplementary material
Source: MDPI journal article supplement (https://www.mdpi.com/2073-4395/11/10/2061)
Supplement: s1 [file s1]

Table S1. The metabolome Database of *Moringa oleifera* L. Cultivated with Vermicompost under Different Soil Types

| Soil type                                                                                                             | Native soil   | Native soil | Agricultural soil | Agricultural soil |
|-----------------------------------------------------------------------------------------------------------------------|---------------|-------------|-------------------|-------------------|
| Fertilizacion                                                                                                         | Vermicomposta | Control     | Vermicomposta     | Control           |
| 1:675.6499@22.8 (AC1L9I4L)                                                                                            | 2529911.778   | 6813001.363 | 430172.0311       | 178695.826        |
| 2:679.7472@8.2 (Ammonium, (5-bromo-2-furfuryl)dimethyl(5-(2,4,6-tribromophenoxy)pentyl)-, bromide)                    | 177762.8158   | 97364.04277 | 256009.46         | 345038.4112       |
| 3:677.3182@23.3 (Atropine)                                                                                            | 126077.689    |             | 562.9794133       |                   |
| 4:622.6172@22.9 (Saginal)                                                                                             | 144270.1996   | 9102.634917 | 68902.7389        |                   |
| 5:663.8078@24.8 (BRN 2909894)                                                                                         | 61057.51118   | 53528.20363 | 90671.974         | 89552.47812       |
| 6:595.3104@5.3 (AC1L1BB5)                                                                                             | 127832.0756   | 62915.5518  | 96098.19183       | 105506.9323       |
| 7:107.4392@0.5                                                                                                        | 91911.52378   | 16462.54636 | 10387.1042        | 16822.93421       |
| 8:166.7449@1.4                                                                                                        | 232160.3877   | 143758.4423 | 55358.39403       | 96057.77451       |
| 9:623.6534@22.5 (n,n'-[ethane-1,2-diylbis(iminoethane-2,1-diyl)]dihexadecanamide)                                     | 57683.17795   | 410603.1014 | 419526.5849       | 309392.6847       |
| 10:120.5232@1.4                                                                                                       | 147446.9185   | 208228.2564 | 80918.88223       | 83553.70509       |
| 11:679.7281@8.0 (Ammonium, (5-bromo-2-furfuryl)dimethyl(5-(2,4,6-tribromophenoxy)pentyl)-, bromide)                   | 84605.72444   | 214633.398  | 63229.88485       | 167577.8298       |
| 12:636.7479@23.2 (3,3',5-triiodothyropropionic acid)                                                                  | 31493.93469   | 12642.33438 | 12018.39948       | 7907.696609       |
| 13:205.8961@2.8 (Carbonic acid, ammonium copper salt)                                                                 | 70073.79572   | 49613.32101 | 12265.76612       | 7586.61217        |
| 14:535.4002@8.0 (1,4-DIDODECYL SULFOSUCCINATE)                                                                        | 32215.81835   | 43414.99558 | 157857.0243       | 61301.22827       |
| 15:763.8226@25.5 (potassium hydrogen[(bis(2-bis(phosphonomethyl)amino)ethyl)amino)methylphosphonate(5:5:1)])          | 52986.46225   | 231945.6749 | 134605.0812       | 179547.3707       |
| 16:675.6009@22.7 (AC1L9I4L)                                                                                           | 5940.057628   | 6547939.101 | 439806.8548       | 124170.5628       |
| 17:621.8614@22.5 (AC1ME2EK)                                                                                           | 666929.2984   | 4663515.736 | 5352487.41        | 3407730.66        |
| 18:871.7282@24.8 (Triacylglycerol 17:1-18:1-18:1; LC-ESI-QTOF; MS; mouse WAT)                                         | 4889.626553   | 1245831.938 | 386581.2638       | 22015.92546       |
| 19:593.8939@21.6 (5-iodocytosine deoxyribonucleoside triphosphate)                                                    | 315915.0017   | 2428474.216 | 1133079.217       | 2149410.547       |
| 20:619.7199@21.8 (n-tetradetracontane)                                                                                | 33866.76799   | 64558.46631 | 3935.236914       | 2373.771142       |
| 21:622.7225@22.6 (3,3',5-triiodothyroacetic acid)                                                                     | 1342.024016   | 43575.50835 | 257131.4343       | 293563.6476       |
| 22:871.7561@26.2 (Triacylglycerol 17:1-18:1-18:1; LC-ESI-QTOF; MS; mouse WAT)                                         | 5514.519142   | 40350.91045 | 34551.86697       | 17905.3634        |
| 23:677.3919@22.7 (Ammonium, (p-benzoquinon-2,5-ylenebis(iminotrimethylene))bis(diethyl(o-methoxybenzyl)-, dichloride) | 44280.73512   | 365282.0873 | 51368.30105       | 25658.2744        |
| 24:637.6328@22.0 (7709-17-3)                                                                                          | 137286.9081   | 2150759.987 | 821420.2986       | 89348.47636       |
| 25:594.6963@21.8 (AI-942/13331563)                                                                                    | 4392.397655   | 8795.097085 |                   |                   |
| 26:885.7467@26.7 (Triolein)                                                                                           | 19344.86146   | 97275.54937 | 179981.6746       | 104835.7643       |
| 27:873.6402@25.0 (NSC634595)                                                                                          | 3768.522211   | 358353.9718 | 33390.20056       | 13150.54841       |
| 28:166.4141@1.4                                                                                                       | 50019.77523   | 58724.52313 |                   |                   |

|                                                                                                                                            |             |             |             |             |
|--------------------------------------------------------------------------------------------------------------------------------------------|-------------|-------------|-------------|-------------|
| 29:886.6297@26.7 (Tetracesium 4,4'-carbonyldipthalate)                                                                                     | 17515.30093 | 50529.15955 | 100823.4708 | 57886.1266  |
| 30:533.8328@16.9 (Bis(4-iodophenyl)iodanium)                                                                                               | 9279.495723 | 33580.90744 | 30546.70196 | 21942.43969 |
| 31:620.5238@18.2 (methyl 1,4,5,6,7,7-hexabromobicyclo[2.2.1]hept-5-ene-2-carboxylate)                                                      | 9206.507089 | 167677.2201 | 244913.7704 | 182447.4022 |
| 32:609.7473@20.7 (NSC266232)                                                                                                               | 17941.19597 | 468395.2676 | 273311.2545 | 279353.9646 |
| 33:887.7525@26.7 (AC1L315G)                                                                                                                | 45357.78016 | 359083.3631 | 43410.45477 | 444086.2352 |
| 34:432.3389@1.0 ((1S*,4S*)-4-(2-(TERT-BUTYLDIMETHYLSILOXY)ETHYL)-3-OXO-4,8,12-TRIMETHYLCYCLOTETRADECA-7(E),11(E)-DIENYL CYANIDE; EI-B; MS) | 23069.82307 | 21348.83233 | 2636.145087 | 64156.9252  |
| 35:596.5225@17.5 (Naphthalene, hexabromo-)                                                                                                 | 5074.08966  | 29073.49571 | 7963.681356 | 6556.159065 |
| 36:636.6877@21.6 (hexabromocyclododecane)                                                                                                  | 15195.43248 | 19535.63178 | 4521.551368 | 3972.522986 |
| 37:888.5870@23.5 (Phytic Acid)                                                                                                             | 216.9828424 | 25316.08506 | 8305.357041 | 818.6071326 |
| 38:763.8401@25.5 (potassium hydrogen[(bis(2-[bis(phosphonomethyl)amino]ethyl)amino)methyl]phosphonate(5:5:1))                              | 23135.59592 | 136763.459  | 82589.05579 | 110752.2379 |
| 39:885.7074@26.4 (NCI60_005293)                                                                                                            | 4026.604196 | 134165.7246 | 191918.2166 | 107921.4901 |
| 40:625.7353@22.5 (trimethyl(octadecyl)azanium)                                                                                             | 3962.175025 | 16869.64428 | 9696.198688 | 9563.640381 |
| 41:764.8101@25.6 (Disodium 2',2'-trithiobis(4,4'-dichloro-2-biphenylsulfinate))                                                            | 21058.18732 | 38738.18254 | 64434.90453 | 94538.84176 |
| 42:643.6341@22.6 (1,1'-Ethylenebis(4,5-dihydro-2-heptadecyl-1H-imidazole))                                                                 | 7986.050046 | 30892.15732 | 16430.03709 | 25811.69963 |
| 43:679.7146@7.1 (Ammonium, (5-bromo-2-furfuryl)dimethyl(5-(2,4,6-tribromophenoxy)pentyl)-, bromide)                                        | 50424.60631 | 137641.8823 | 102352.0182 | 105870.6319 |
| 44:675.6358@23.0 (AC1L9I4L)                                                                                                                | 1965724.563 | 162668.7004 | 4752.600256 | 4186.940068 |
| 45:638.6694@21.8 (1,1,4,7,10,10-hexabromododecane)                                                                                         | 44949.27057 | 544730.8351 | 240152.6652 | 174388.9365 |
| 46:623.5143@22.5 (Octadecyloctaglycol)                                                                                                     | 7440.671755 | 662641.0085 | 336008.3306 | 229768.1824 |
| 47:257.2740@20.1 (palmitate)                                                                                                               | 62.71790158 | 237107.9104 | 136.5708424 | 85.68130507 |
| 48:871.7021@25.4 (ALUMINUM OLEATE)                                                                                                         | 4390.281283 | 686002.2435 | 64166.50461 | 7601.980503 |
| 49:679.7482@8.3 (Ammonium, (5-bromo-2-furfuryl)dimethyl(5-(2,4,6-tribromophenoxy)pentyl)-, bromide)                                        | 243269.2499 | 310516.7799 | 299462.6925 | 304772.8898 |
| 50:653.6596@22.0 (CHOLESTERYL STEARATE; EI-B; MS)                                                                                          | 4471.30377  | 189144.3446 | 113308.7749 | 115216.5223 |
| 51:622.8572@22.7 (quercetin 3, 3', 4', 7-tetrasulfate)                                                                                     | 85211.50686 | 283106.9889 | 444944.0205 | 362721.4604 |
| 52:563.9034@23.5 (ferric-adenosine triphosphate complex)                                                                                   | 543.5124346 | 130808.0705 | 82145.52884 | 50828.2931  |
| 53:639.5956@21.7 (2-octaprenylphenol)                                                                                                      | 9527.98229  | 163831.9886 | 59569.71001 | 58921.74512 |
| 54:636.7542@22.8 (3,3',5-triiodothyropropionic acid)                                                                                       | 22328.29083 | 149306.6523 | 200452.3627 | 131594.4146 |
| 55:636.6551@21.3 (hexabromocyclododecane)                                                                                                  | 8809.967358 | 229648.8466 | 155489.4965 | 138100.3051 |
| 56:671.5713@22.1 (Diocadecyl phthalate)                                                                                                    | 2064.789551 | 71672.11763 | 6711.606632 | 4236.012216 |
| 57:620.5723@18.2 (AC1L1SJC)                                                                                                                | 2539.874215 | 166369.8091 | 234142.1555 | 180188.8526 |
| 58:903.6381@27.0 (64346-20-9)                                                                                                              | 1462.229055 | 106382.9277 | 94202.8677  | 44853.87353 |
| 59:565.4674@20.5 (2-Ethylhexyl titanate)                                                                                                   | 448.0015755 | 152804.3512 | 4982.323411 | 1507.286718 |

|                                                                                                                                                                        |             |             |             |             |
|------------------------------------------------------------------------------------------------------------------------------------------------------------------------|-------------|-------------|-------------|-------------|
| 60:813.8707@26.6 (AC1L2IAV)                                                                                                                                            | 7169.113717 | 127439.418  | 52105.99293 | 5265.524202 |
| 61:625.6852@20.9 (2-methyloxirane; 1-octadecoxyoctadecane; oxirane)                                                                                                    | 3976.702973 | 79402.2646  | 48141.5579  | 33225.91505 |
| 62:655.0140@25.9 (EOSIN TOLUIDINE BLUE)                                                                                                                                | 1468.360778 | 53029.35677 | 29608.79383 | 10791.89576 |
| 63:889.6010@27.0 (Phosphatidylinositol 18:0-20:3; LC-ESI-ITFT; MS2; [M-H] <sup>-</sup> ; RT: 23.31; Exp: 1)                                                            |             |             |             |             |
|                                                                                                                                                                        | 3998.036069 | 92315.62087 | 89300.51829 | 66790.09761 |
| 64:747.9729@26.7 (AC1L4XFZ)                                                                                                                                            | 5720.88355  | 69578.17496 | 34341.51765 | 45930.92636 |
| 65:651.5600@20.5 (cholesteryl oleate)                                                                                                                                  | 743.869135  | 61784.9814  | 20033.95348 | 16333.01192 |
| 66:120.5236@1.4                                                                                                                                                        | 152304.1906 | 204549.0473 | 60026.25246 | 96185.70634 |
| 67:166.7520@1.4                                                                                                                                                        | 185415.7596 | 188893.5703 | 71005.35256 | 83574.09992 |
| 68:745.9112@25.2 (AC1Q4PGR)                                                                                                                                            | 31590.4135  | 108922.3487 | 69818.02557 | 108074.5859 |
| 69:623.9246@22.9 (copper(2+) hydrogen 3-[(e)-[3-methyl-5-oxido-1-(4-[[2-(sulfonatooxy)ethyl]sulfonyl]phenyl)-1h-pyrazol-4-yl]diazanyl]-4-oxidobenzenesulfonate(1:2:1)) | 14354.02538 | 57405.33371 | 46759.45318 | 24731.67272 |
| 70:607.7361@20.2 (pentacobaltic dodecacyanide)                                                                                                                         | 3836.631098 | 129910.5793 | 104237.4099 | 81208.6643  |
| 71:697.0368@25.2 (14569-54-1)                                                                                                                                          | 567.1552154 | 33012.54991 | 6937.213796 | 2541.730297 |
| 72:609.7955@20.6 (NSC266232)                                                                                                                                           | 10765.62312 | 49522.69324 | 259135.2622 | 310265.7692 |
| 73:681.6229@21.2 (Cholesteryl oleyl carbonate)                                                                                                                         | 4091.995452 | 92634.72533 | 90423.49357 | 64684.07565 |
| 74:886.6378@25.2 (Tetracesium 4,4'-carbonyldiphthalate)                                                                                                                | 802.1233566 | 54258.10253 | 2967.673962 | 1431.857474 |
| 75:759.7042@23.9 (Bis[17-(1,5-dimethylhexyl)-4,13-dimethyl-7,8,9,11,12,13,14,15,16,17-decahydro-6H-cyclopenta[a]phenanthren-3-yl]diazene)                              | 4378.20887  | 33854.97422 | 9682.715578 | 12322.79126 |
| 76:625.5510@22.5 (ETHYLENEBIS-12-HYDROXYSTEARAMIDE)                                                                                                                    | 89.24579239 | 29954.74121 | 8076.49354  | 5208.902753 |
| 77:653.5911@20.4 (CHOLESTERYL STEARATE; EI-B; MS)                                                                                                                      | 1521.882855 | 27439.77832 | 13781.04912 | 11817.15288 |
| 78:132.6454@0.6                                                                                                                                                        | 38613.17209 | 53597.27183 | 18228.45706 | 18117.31183 |
| 79:659.6326@22.1 (1-amino-n-(2-[[2-[(2-aminoethyl)amino]ethyl]amino)ethyl]amino)ethyl)-13-(1-hydroxynonyl)-3,6,9,12-tetraazahenicosan-21-amide)                        | 8738.951    | 24131.22469 | 14580.41659 | 15971.84092 |
| 80:781.7518@25.8 (Pentaerythritol dibehenate)                                                                                                                          | 13967.01681 | 63977.90958 | 31372.76609 | 41541.08193 |
| 81:765.7792@25.3 (AC1LBKDL)                                                                                                                                            | 9597.210961 | 23803.75948 | 19449.52672 | 47829.97816 |
| 82:874.6099@24.7 (AC1MHVM3)                                                                                                                                            | 265.6377058 | 35891.72572 | 2748.13762  | 670.7748299 |
| 83:625.7433@23.6 (trimethyl(octadecyl)azanium)                                                                                                                         | 4068.471331 | 20867.99644 | 16549.68072 | 18967.23382 |
| 84:815.7785@25.1 (AC1N7TCR)                                                                                                                                            | 449.6768001 | 18317.26842 | 42608.77197 | 4755.84223  |
| 85:746.9758@25.4 ((2,4,5-Trichlorophenoxy)acetic acid 1,4-piperazinediyl-di-3,1-propanediyl ester 2HCl)                                                                | 4566.837613 | 26527.05316 | 16933.64759 | 20311.05155 |
| 86:635.8218@22.6 (BRN 0575813)                                                                                                                                         | 126077.1326 | 593490.6427 | 28233.63105 | 939794.5582 |
| 87:621.8651@22.7 (AC1ME2EK)                                                                                                                                            | 602321.5501 | 931538.0137 | 1068526.384 | 329328.2451 |
| 88:651.7410@22.1 (METRIZOATE MAGNESIUM)                                                                                                                                | 2708.57798  | 56387.58545 | 84558.2127  | 73987.67338 |

|                                                                                                                                                     |             |             |             |             |
|-----------------------------------------------------------------------------------------------------------------------------------------------------|-------------|-------------|-------------|-------------|
| 89:690.4404@21.5 (3,7,12,17-Tetramethyl-21H,23H-porphine-2,18-dipropionic acid dihydrochloride)                                                     | 150.1905117 | 13264.90391 | 1306.468605 | 697.4722516 |
| 90:742.6915@24.7 (93803-15-7)                                                                                                                       | 1173.117921 | 28821.04835 | 18740.66746 | 7330.946102 |
| 91:676.5589@23.0 (1,2-dimyristoylamido-1,2-deoxyphosphatidylcholine)                                                                                | 1251.402089 | 38724.45948 | 1584.680223 | 994.1112331 |
| 92:667.5920@22.2 (2,3-bis(octanoyloxy)propyl docosanoate)                                                                                           | 2673.629213 | 13926.24196 | 24495.11955 | 9525.155859 |
| 93:770.6070@25.3 (Phosphatidylcholine 17:1-18:2; LC-ESI-ITFT; MS2; [M+CH3COO] <sup>-</sup> ; RT: 16.00; Exp: 1)                                     | 1374.354467 | 44408.15959 | 57509.37538 | 22203.8728  |
| 94:595.3025@5.3 (AC1L1BB5)                                                                                                                          | 54755.43277 | 57710.02144 | 87716.47621 | 101067.4943 |
| 95:654.6260@22.0 (tetrachlororhenium(1-))                                                                                                           | 2034.61417  | 74031.9433  | 37515.78507 | 20391.48913 |
| 96:681.5758@22.1 (Cholesteryl oleyl carbonate)                                                                                                      | 2523.99342  | 29022.36664 | 10393.68646 | 6437.043054 |
| 97:901.5952@26.1 (Phosphatidylinositol 19:0-20:4; LC-ESI-ITFT; MS2; [M-H] <sup>-</sup> ; RT: 24.37; Exp: 1)                                         | 4340.53675  | 35645.84239 | 48483.63522 | 27018.93203 |
| 98:635.6624@21.6 (2,3-bis(octadec-9-enoxy)propyl-trimethylazanium)                                                                                  | 17865.1446  | 31481.36615 | 8995.504039 | 6920.648695 |
| 99:635.7665@21.2 (BRN 0575813)                                                                                                                      | 952.7627114 | 446555.0282 | 311115.4469 | 191688.1886 |
| 100:631.0820@25.3 (AC1L2VDW)                                                                                                                        | 1194.589981 | 26538.89783 | 7792.024475 | 9755.12217  |
| 101:609.7167@20.6 (AC1L98SZ)                                                                                                                        | 6826.500293 | 178355.4852 | 212988.8778 | 275154.4649 |
| 102:432.6118@0.5 (AC1NRVRU)                                                                                                                         | 62681.62637 | 44968.83593 | 23988.48291 | 119197.8493 |
| 103:773.5139@22.1 (Phosphatidylglyceride 18:1-18:2; LC-ESI-ITFT; MS2; [M-H] <sup>-</sup> ; RT: 10.90; Exp: 1)                                       | 3473.081368 | 30385.77629 | 56433.30697 | 29179.31689 |
| 104:903.6351@26.0 (64346-20-9)                                                                                                                      | 12615.91904 | 33905.3847  | 41471.37209 | 38074.45687 |
| 105:624.9524@21.2 (perfluorophenanthrene)                                                                                                           | 2168.456645 | 6363.473913 | 8663.852014 | 4828.75051  |
| 106:762.9229@25.5 (NSC718384)                                                                                                                       | 21297.44388 | 79168.9453  | 57764.26349 | 75721.39462 |
| 107:659.6807@22.2 (1-amino-n-(2-([2-([2-(2-aminoethyl)amino]ethyl)amino]ethyl)amino]ethyl)-13-(1-hydroxynonyl)-3,6,9,12-tetraazahenicosan-21-amide) | 5559.972206 | 24751.8911  | 6503.717453 | 5884.989033 |
| 108:773.4615@22.4 (AC1L1B5J)                                                                                                                        | 10394.31588 | 10999.18318 | 10226.70116 | 4641.20146  |
| 109:931.6710@26.3 (piperazine-1,4-diyl diethane-2,1-diyl dioctadecanoate- methyl hydrogen sulfate(1:2))                                             | 786.6463632 | 14908.51452 | 33447.12195 | 14528.38074 |
| 110:735.0153@25.3 (AC1L1X9E)                                                                                                                        | 2125.55213  | 44525.23842 | 13023.88782 | 37741.69976 |
| 111:737.0443@25.7 (adenosine tetraphosphopyridoxal)                                                                                                 | 1336.917125 | 37128.6875  | 10859.44365 | 79892.15196 |
| 112:813.8235@25.9 (AC1L2IAV)                                                                                                                        |             | 12814.41649 | 8968.906265 | 7467.021249 |
| 113:762.7354@24.1 (ST50986961)                                                                                                                      | 3671.898019 | 40416.83911 | 27260.50423 | 34405.75782 |
| 114:739.0619@26.0 (Disufene)                                                                                                                        | 632.8263625 | 22735.76804 | 4653.879015 | 18130.52016 |
| 115:777.6725@24.0 (Triacylglycerol 12:0-16:0-18:1; LC-ESI-QTOF; MS; mouse WAT)                                                                      | 4602.249725 | 16833.67855 | 10036.85564 | 12259.15277 |
| 116:675.4602@22.7 (1-18:1-2-16:0-phosphatidate)                                                                                                     | 1830.389351 | 11640.45777 | 46088.9202  | 172916.6486 |
| 117:637.6866@21.8 (2,4,6-tritridecyl-1,3,5-trioxane)                                                                                                | 105772.4694 | 2105823.161 | 732231.7496 | 671373.8162 |

|                                                                                                                        |             |             |             |             |
|------------------------------------------------------------------------------------------------------------------------|-------------|-------------|-------------|-------------|
| 118:622.7689@22.8 (3,3',5-triiodothyroacetic acid)                                                                     | 129801.8355 | 202653.3747 | 492153.6769 | 227815.1963 |
| 119:694.4269@18.0 (Dehydag Wax E)                                                                                      | 20552.29898 | 219512.2844 | 477240.5081 | 394352.5295 |
| 120:636.7246@22.8 (17086-13-4)                                                                                         | 18979.8503  | 112551.0466 | 246384.3267 | 169231.0917 |
| 121:887.6776@26.7 (AC1L315G)                                                                                           | 16934.00689 | 43017.8784  | 65740.82827 | 63431.04909 |
| 122:694.3914@18.0 (germerine)                                                                                          | 34269.3425  | 128922.6355 | 283011.327  | 98091.60583 |
| 123:903.6399@27.0 (64346-20-9)                                                                                         | 2449.570934 | 106957.9849 | 101227.9671 | 86909.79868 |
| 124:595.6419@21.6 ((3R,7R,11S,15S,18S,22S,26R,30R)-3,7,11,15,18,22,26,30-Octamethyldotriacontane-1,32-diol; FAB-B; MS) | 2069.363448 | 151610.9796 | 185911.0812 | 130768.2623 |
| 125:613.9537@23.8 (diiodoplatinum(2+);piperidin-1-ide;2H-pyridin-1-ide)                                                | 17304.86711 | 29951.31977 | 56950.0302  | 26713.02539 |
| 126:901.6038@26.1 (Phosphatidylinositol 19:0-20:4; LC-ESI-ITFT; MS2; [M-H] <sup>-</sup> ; RT: 24.37; Exp: 1)           | 3242.175969 | 19676.1069  | 46596.49894 | 26535.91598 |
| 127:607.8383@20.2 (AC1L4HXI)                                                                                           | 4680.724289 | 63928.26745 | 159231.1264 | 78510.33586 |
| 128:570.0368@23.6 (rebeccamycin)                                                                                       | 6391.774222 | 21011.90476 | 40058.48683 | 32405.85284 |
| 129:622.5629@19.0 (UNII-VYP38H02CO)                                                                                    | 1060.953581 | 18147.29171 | 34931.41289 | 25791.44428 |
| 130:813.8709@26.6 (AC1L2IAV)                                                                                           | 3575.299225 | 91308.75469 | 42743.99351 | 2281.270955 |
| 131:626.7040@20.8 (2,2'-oxybis[5,5-bis(bromomethyl)-1,3,2-dioxaphosphinane] 2,2'-dioxide)                              | 1296.278009 | 22944.6816  | 32298.95478 | 34626.91137 |
| 132:627.8252@23.9 (BRN 3038217)                                                                                        | 3941.309999 | 98210.32513 | 38777.55467 | 55381.32607 |
| 133:749.8475@25.1 (AC1MR3SH)                                                                                           | 1197.657953 | 6419.388759 | 22864.58742 | 13380.26621 |
| 134:621.8934@22.4 (8-((4-bromo-2,3-dioxobutyl)thio)adenosine 5'diphosphate)                                            | 4136.017217 | 3984408.344 | 5076695.431 | 4001610.126 |
| 135:676.4283@22.6 (NSC720385)                                                                                          | 1300.399521 | 5583.315325 | 95318.58459 | 149995.4728 |
| 136:607.8898@21.9 (AC1L2NSX)                                                                                           | 7734.027198 | 143764.4051 | 210284.5947 | 221502.549  |
| 137:610.8076@20.8 (tetrasodium pyrene-1,3,6,8-tetrasulfonate)                                                          | 10727.65088 | 96988.82855 | 119361.3542 | 125170.7325 |
| 138:888.6278@27.0 (AC1N12U6)                                                                                           | 12593.64772 | 133775.7146 | 80705.43536 | 138015.3574 |
| 139:596.5136@17.3 (Naphthalene, hexabromo-)                                                                            | 1296.658889 | 33751.6473  | 58678.89347 | 95001.15458 |
| 140:767.2388@8.4 (28043-31-4)                                                                                          | 6353.768241 | 11885.51076 | 10491.47082 | 64067.30336 |
| 141:637.8304@21.9 (G 1026)                                                                                             | 1426.241153 | 204374.9711 | 89802.46811 | 84532.8607  |
| 142:602.5644@20.2 (tetrasilver(1+) diphosphate)                                                                        | 284.3051758 | 305.1602261 | 1955.962446 | 64169.81786 |
| 143:637.7492@21.1 (NSC407180)                                                                                          | 3603.49602  | 70547.72411 | 79760.0035  | 91660.52107 |
| 144:621.7727@23.2 (Potassium hexathiocyanatoplatinate(IV))                                                             | 82731.54297 | 61964.62036 | 60812.68873 | 37329.03837 |
| 145:575.6412@18.7 (AC1L2ATR)                                                                                           | 764.6167061 | 3480.343019 | 6270.860599 | 70844.27236 |
| 146:800.1313@22.8 (coenzyme A persulfide)                                                                              | 131.6693818 | 35376.56261 | 22132.83389 | 25459.53283 |
| 147:764.7908@25.5 (Disodium 2',2'-trithiobis(4,4'-dichloro-2-biphenylsulfinate))                                       | 17303.13196 | 100349.975  | 72552.53382 | 96503.48286 |
| 148:679.7171@6.4 (Ammonium, (5-bromo-2-furfuryl)dimethyl(5-(2,4,6-tribromophenoxy)pentyl)-. bromide)                   | 4949.684367 | 34657.23574 | 43192.31115 | 57060.43826 |

|                                                                                                                                                           |             |             |             |             |
|-----------------------------------------------------------------------------------------------------------------------------------------------------------|-------------|-------------|-------------|-------------|
| 149:779.6987@25.1 (Triacylglycerol 14:0-16:0-16:0; LC-ESI-QTOF; MS; mouse WAT)                                                                            | 14999.3872  | 50228.46989 | 32912.83676 | 42184.88854 |
| 150:760.9891@25.2 (bis(dipropoxyphosphinothioylsulfanyl)stibanylsulfanyl-dipropoxy-sulfanylidene- $\text{P}^{\text{5}}$ -phosphane)                       | 725.8085703 | 5572.356196 | 2761.244721 | 15556.1687  |
| 151:675.4434@22.7 (AC1L1ELZ)                                                                                                                              | 2799.053879 | 583717.7987 | 283987.0592 | 174684.1394 |
| 152:694.6335@17.9 (Tetrarubidium 4,4'-carbonyldipthalate)                                                                                                 |             | 61048.27442 | 227175.0879 | 126393.2829 |
| 153:563.8990@23.4 (ferric-adenosine triphosphate complex)                                                                                                 | 479.9114032 | 107155.9479 | 181414.1521 | 220006.8826 |
| 154:887.7874@27.0 (Triacylglycerol 18:0-18:1-18:1; LC-ESI-QTOF; MS; mouse WAT)                                                                            | 9433.857026 | 215422.7699 | 120011.106  | 139272.258  |
| 155:638.6735@21.8 (1,1,4,7,10,10-hexabromododecane)                                                                                                       | 37496.22891 | 312800.0458 | 244084.4247 | 184829.2464 |
| 156:533.8178@17.0 (Bis(4-iodophenyl)iodanium)                                                                                                             | 27584.70926 | 38737.93057 | 38007.10984 | 28839.19148 |
| 157:637.6131@22.8 (7709-17-3)                                                                                                                             | 6828.275649 | 10540.84629 | 78453.04169 | 77009.56345 |
| 158:1184.7423@21.5 (AC1LAAM2)                                                                                                                             | 33.24350225 | 35325.54504 | 53079.90484 | 23021.33691 |
| 159:625.7446@20.8 (trimethyl(octadecyl)azanium)                                                                                                           | 2480.186211 | 54780.66182 | 51999.94339 | 53472.42904 |
| 160:278.2439@16.6 (EHNA)                                                                                                                                  | 559.7160526 | 111401.3058 | 92284.32824 | 120573.3859 |
| 161:534.6741@16.8 (NSC39610)                                                                                                                              | 689.7231747 | 10905.9554  | 5279.969644 | 4100.994283 |
| 162:749.9248@25.2 (AC1L5BTC)                                                                                                                              | 2463.786851 | 11680.67608 | 33689.10064 | 18786.59679 |
| 163:873.6276@24.6 (AC1L2JBC)                                                                                                                              | 240.5163911 | 107651.9176 | 25357.20839 | 971.2806241 |
| 164:608.8796@20.5 (copper(2+) hydrogen 7-amino-4-oxido-3-[(e)-(2-oxido-4-[[2-(sulfonatooxy)ethyl]sulfonyl]phenyl)diazeryl]naphthalene-2-sulfonate(1:2:1)) | 992.7681558 | 14197.0214  | 14287.18655 | 14847.01305 |
| 165:653.7434@19.9 (AC1LAX5N)                                                                                                                              | 749.2433345 | 15298.99979 | 17983.69759 | 10259.1133  |
| 166:765.7531@25.0 (AC1LBKDL)                                                                                                                              | 2123.418021 | 23412.08978 | 19077.08795 | 15531.77503 |
| 167:328.4758@1.5                                                                                                                                          | 27119.96077 | 30884.34239 | 16032.88103 | 105687.756  |
| 168:745.9251@25.2 (AC1Q4PGR)                                                                                                                              | 21982.96058 | 115459.162  | 78858.24947 | 109133.4535 |
| 169:675.5621@22.7 (AC1L1T8U)                                                                                                                              | 5959.481181 | 5624990.109 | 400730.6682 | 640636.6485 |
| 170:638.5282@21.7 (Hexabromodiphenyl oxide)                                                                                                               | 1145.628586 | 189864.164  | 215224.4523 | 201133.7327 |
| 171:622.9079@22.7 (quercetin 3, 3', 4', 7-tetrasulfate)                                                                                                   | 33644.14011 | 231569.6482 | 122952.7372 | 168204.9931 |
| 172:623.7985@22.5 (2-((2-Benzothiazolylsulfonyl)methyl)-6,8-dibromo-3-(2-chlorophenyl)-4(3H)-quinazolinone)                                               | 16733.73259 | 276811.2476 | 245031.8993 | 161360.6349 |
| 173:677.3493@22.7 (Atropine)                                                                                                                              | 1900.56311  | 317390.1609 | 52429.94246 | 67404.33343 |
| 174:636.6580@21.3 (hexabromocyclododecane)                                                                                                                | 1495.376674 | 193396.7515 | 170698.9714 | 159418.2973 |
| 175:651.7677@22.0 (3,5,3'-triiodo-L-thyronine)                                                                                                            | 792.2958808 | 52102.68331 | 86130.23163 | 70705.70517 |
| 176:680.7176@8.3 (BRN 0066005)                                                                                                                            | 38170.73009 | 89940.34155 | 75714.20702 | 81995.75004 |
| 177:654.6171@22.0 (SCHEMBL6253692)                                                                                                                        | 1114.923913 | 46520.435   | 46603.05352 | 41608.11885 |
| 178:651.6301@20.4 ( hexanedioic acid )                                                                                                                    | 1267.5863   | 23331.74008 | 24174.91176 | 24705.10973 |
| 179:885.6624@25.0 (AC1L4CS8)                                                                                                                              | 922.4128926 | 27250.62368 | 21448.65781 | 3320.249013 |
| 180:575.6921@18.8 (AC1L2ATR)                                                                                                                              | 693.0572819 | 5608.266859 | 7278.628332 | 29482.53016 |

|                                                                                           |             |             |             |             |
|-------------------------------------------------------------------------------------------|-------------|-------------|-------------|-------------|
| 181:643.8606@23.9 (trisodium;8-[(3,5-dinitrobenzoyl)amino]naphthalene-1,3,5-trisulfonate) | 11909.94696 | 28587.26983 | 11257.0672  | 14831.46123 |
| 182:626.8689@23.6 (bismuth titanate)                                                      | 2846.565888 | 15468.02366 | 8823.984869 | 12350.70819 |
| 183:831.8249@26.3 (AC1N581S)                                                              | 3083.491725 | 17228.80947 | 8401.72286  | 8660.759556 |
| 184:765.8247@25.5 (AC1N4QAW)                                                              | 1559.036455 | 25058.39513 | 28378.30719 | 16731.61203 |
| 185:661.6792@23.4 (AC1L6HD5)                                                              | 4172.512118 | 18149.0648  | 7109.663623 | 9708.378291 |
| 186:780.7258@25.3 (kartocid)                                                              | 8636.627928 | 43110.714   | 29589.94738 | 37233.30204 |
